# Supplementary material for: The Atypical MAP Kinase MAPK15 Is Required for Lung Adenocarcinoma Metastasis via Its Interaction with NF-κB p50 Subunit and Transcriptional Regulation of Prostaglandin E2 Receptor EP3 Subtype
Source: MDPI journal article supplement (doi:10.3390/cancers15051398), 2023-02-22
Supplement: s1 [file s1]

**Table S1** Primer and siRNA used in this study

| Gene/siRNA       | Sense (5' to 3')        | Antisense (5' to 3')     |
|------------------|-------------------------|--------------------------|
| <i>β-actin</i>   | GAGCTACGAGCTGCCTGACG    | CTCCATGCCCAGGAAGGAAGG    |
| <i>MAPK15</i>    | GACCAGAAGCCGTCCAATGT    | GTATCGGTGCGAAGAGAGCA     |
| <i>EP3</i>       | CTCCGCTCCTGATAATGATGTTG | CTTTCTGCTTCTCCGTGTGTG    |
| <i>NF-κB p50</i> | GCAGCTGGGAGATCGGGAAA    | TTGTGAAGCTGCCAGTGCTA     |
| <i>MMP2</i>      | GTCCCCATGAAGCCCTGTTC    | GCTGTCATAGGATGTGCCCT     |
| <i>EP3 siRNA</i> | CGAACAGCUAUUAAGAAGUUGC  | GCAACUUCUUCUAAUAGCUGUUCG |

**Table S2** Correlation between MAPK15 expression and clinicopathological parameters in patients with lung cancer

| Clinicopathological parameters | MAPK15 expression |      | Total | <i>p</i> value |
|--------------------------------|-------------------|------|-------|----------------|
|                                | Low               | High |       |                |
| Age (years)                    |                   |      |       | 0.688          |
| <59                            | 24                | 31   | 55    |                |
| ≥59                            | 22                | 33   | 55    |                |
| Gender                         |                   |      |       | 0.510          |
| Male                           | 36                | 46   | 82    |                |
| Female                         | 10                | 18   | 28    |                |
| Depth of tumor invasion        |                   |      |       | 0.100          |
| T1+T2                          | 40                | 47   | 87    |                |
| T3+T4                          | 6                 | 17   | 23    |                |
| Regional lymph nodes           |                   |      |       | 0.012*         |
| N0                             | 31                | 27   | 58    |                |
| N1+N2                          | 15                | 37   | 52    |                |
| Distant metastasis             |                   |      |       | 1.000          |
| M0                             | 46                | 63   | 109   |                |
| M1                             | 0                 | 1    | 1     |                |
| Grade                          |                   |      |       | 0.621          |
| 1                              | 2                 | 1    | 3     |                |
| 2                              | 19                | 28   | 47    |                |
| 3                              | 13                | 22   | 35    |                |
| Stage                          |                   |      |       | 0.033*         |
| I                              | 29                | 26   | 55    |                |
| II+ III+ IV                    | 17                | 38   | 55    |                |

Fisher's exact test. Statistically significant, \*  $p < 0.05$ .

**Table S3** Correlation between MAPK15 expression and tissue types

|                              | MAPK15 expression |      | Total | $\chi^2$ | <i>p</i> value |
|------------------------------|-------------------|------|-------|----------|----------------|
|                              | Low               | High |       |          |                |
| Histological type            |                   |      |       | 4.076    | 0.044*         |
| Adenocarcinoma               | 15                | 33   | 48    |          |                |
| Squamous cell lung carcinoma | 21                | 19   | 40    |          |                |

Chi-square test ( $\chi^2$ ). Statistically significant, \*  $p < 0.05$ .

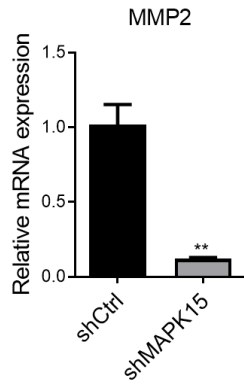

Figure S1. Matrix metalloproteinase-2 (MMP2) was significantly decreased in MAPK15 knockdown H1299 cells. \*\*  $p < 0.01$ , Student's  $t$ -test.

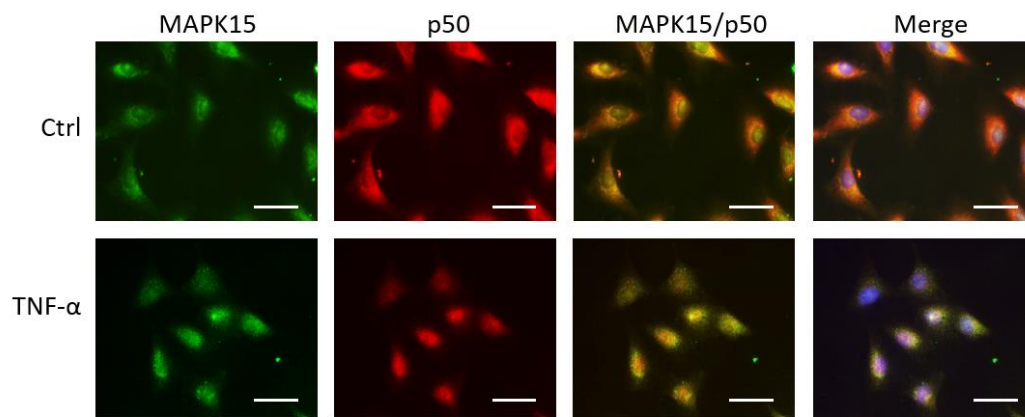

Figure S2. Localization of MAPK15 and p50 in TNF- $\alpha$  treated A549 cells. A549 cells were treated with/without TNF- $\alpha$  and antibodies against MAPK15 and p50 were used to detect the localization of MAPK15 and p50.

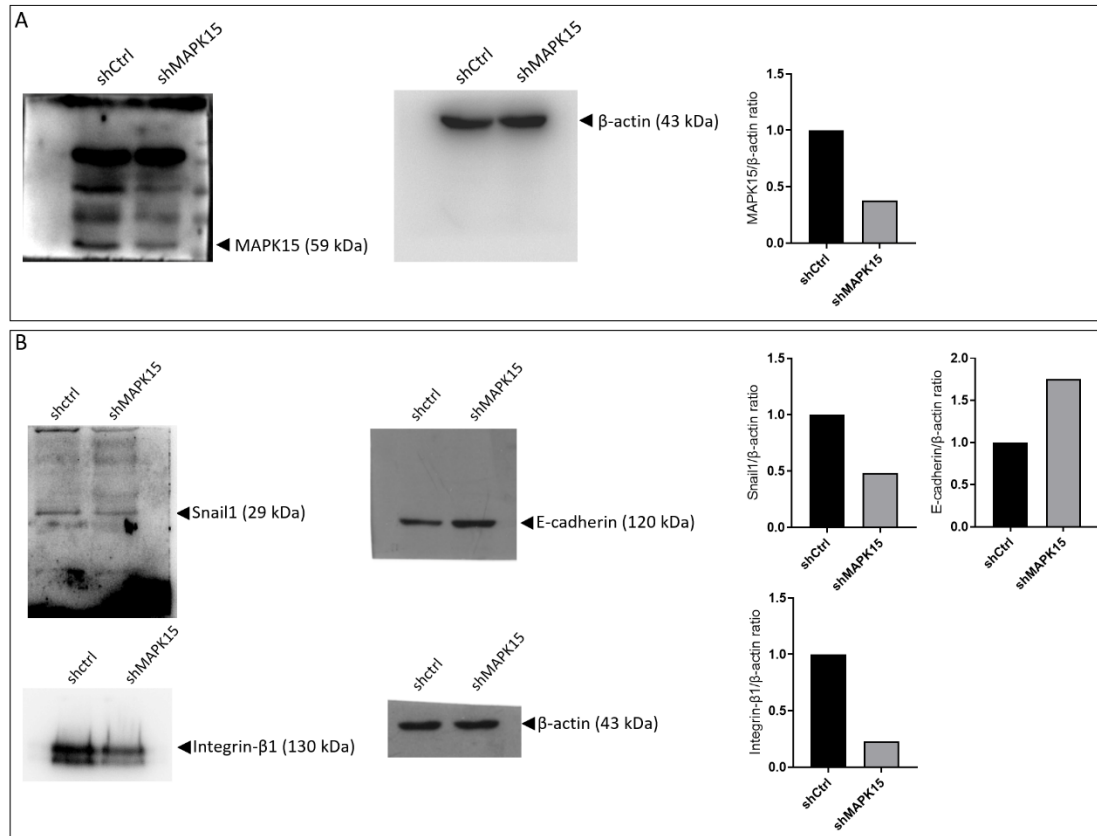

Figure S3. Original blots and blot quantification of Figure 1. Immunoblot analysis of MAPK15, Snail1, E-cadherin and Integrin-β1 that correspond to Figure 1D (A) and Figure 1G (B).

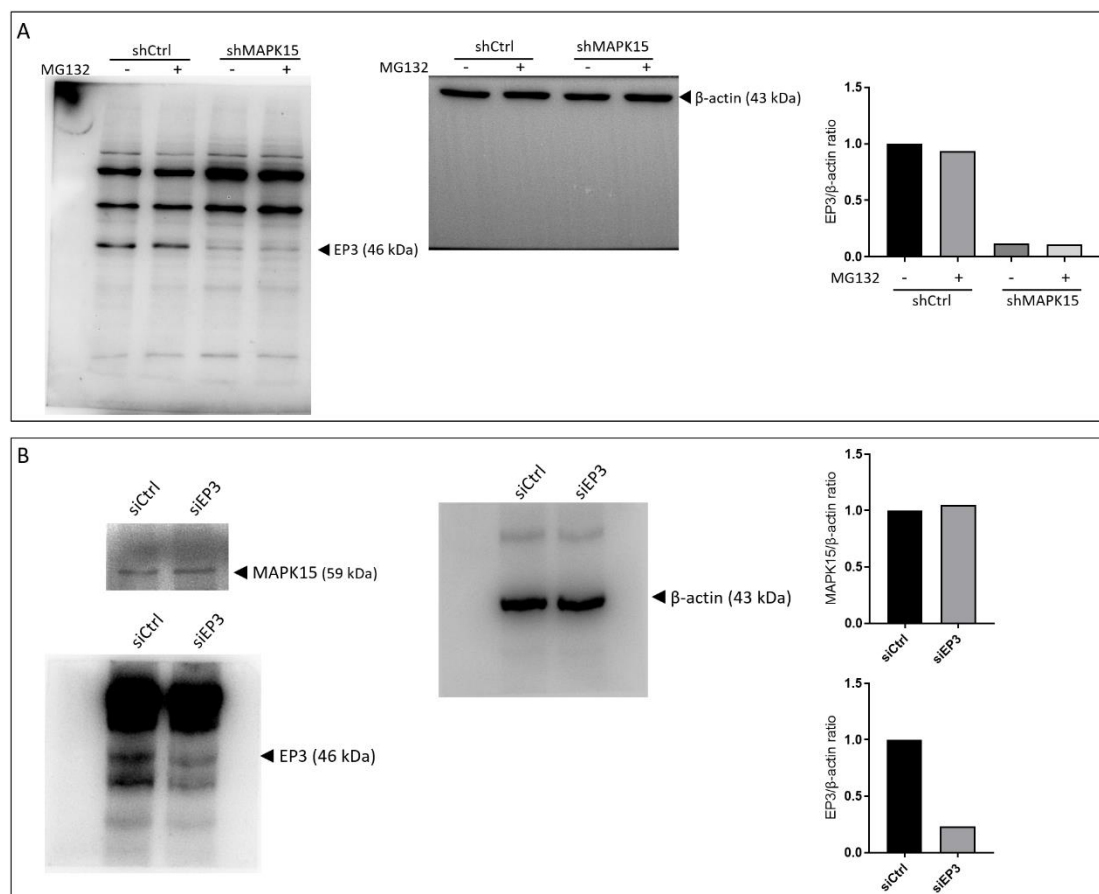

Figure S4. Original blots and blot quantification of Figure 2. Immunoblot analysis of EP3 and MAPK15 that correspond to Figure 2B (A) and Figure 2E (B).

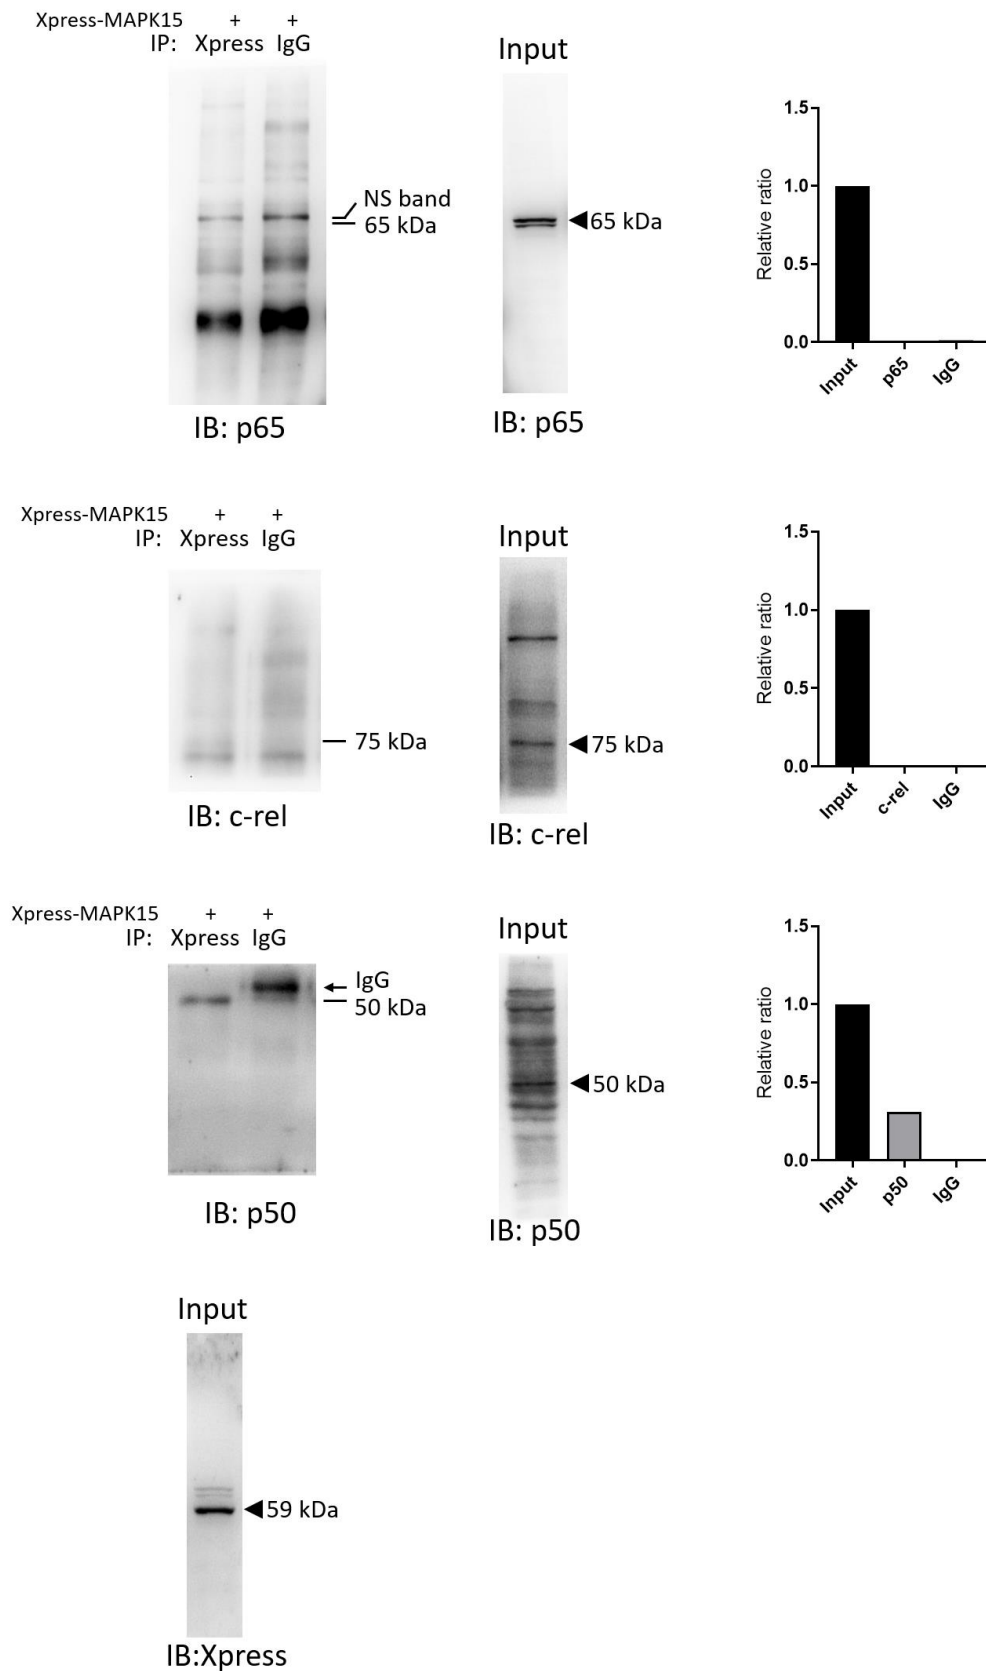

Figure S5. Original blots and blot quantification of Figure 3. Immunoblot analysis of co-immunoprecipitation that corresponds to Figure 3A. NS, non-specific.

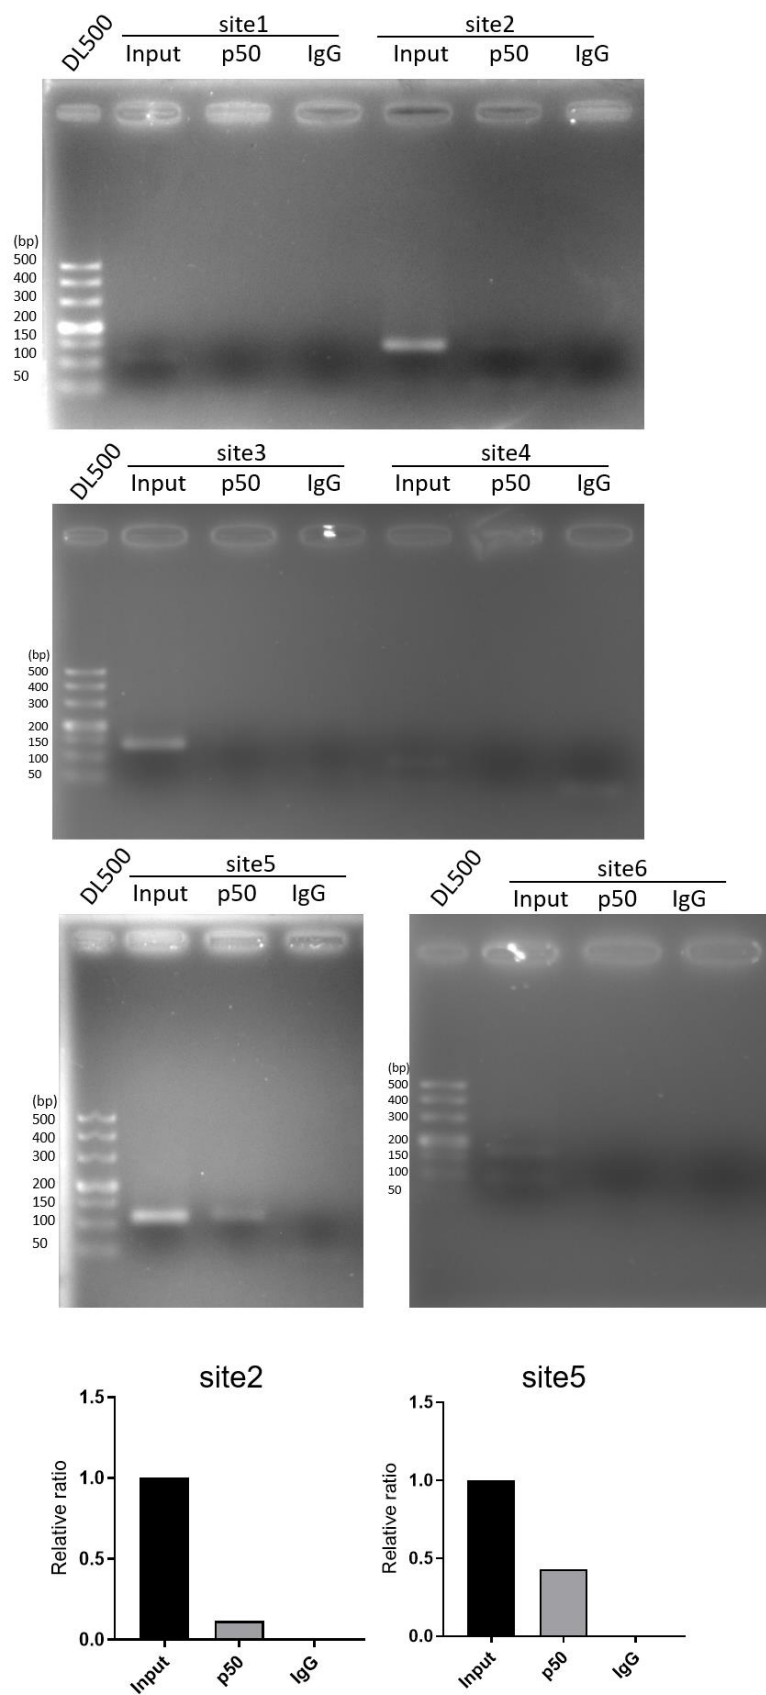

Figure S6. Original gels and gel quantification of Figure 3. Agarose gel electrophoresis results that correspond to Figure 3F.

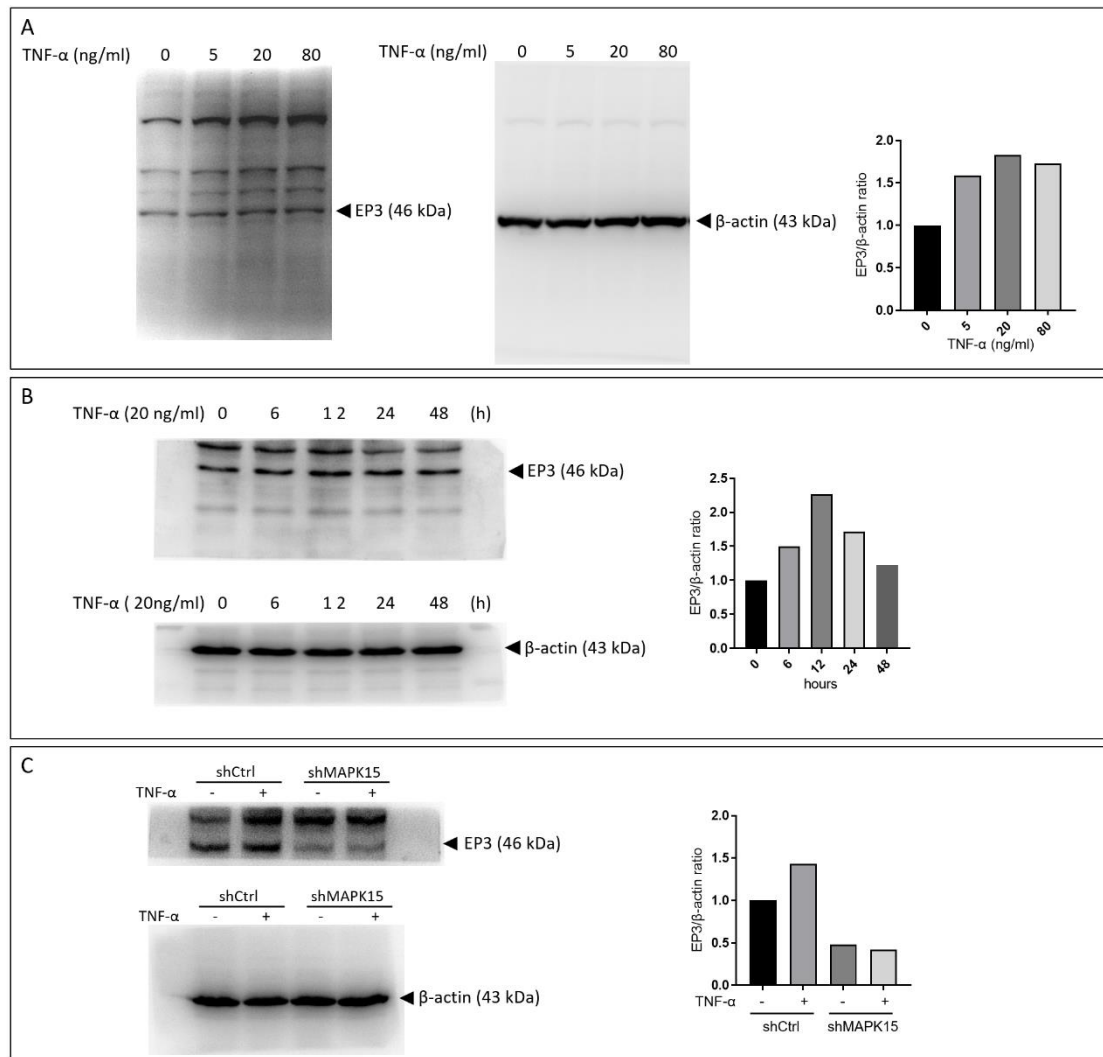

Figure S7. Original blots and blot quantification of Figure 4. Immunoblot analysis of EP3 expression corresponds to Figure 4A (A), Figure 4B (B), Figure 4F(C).

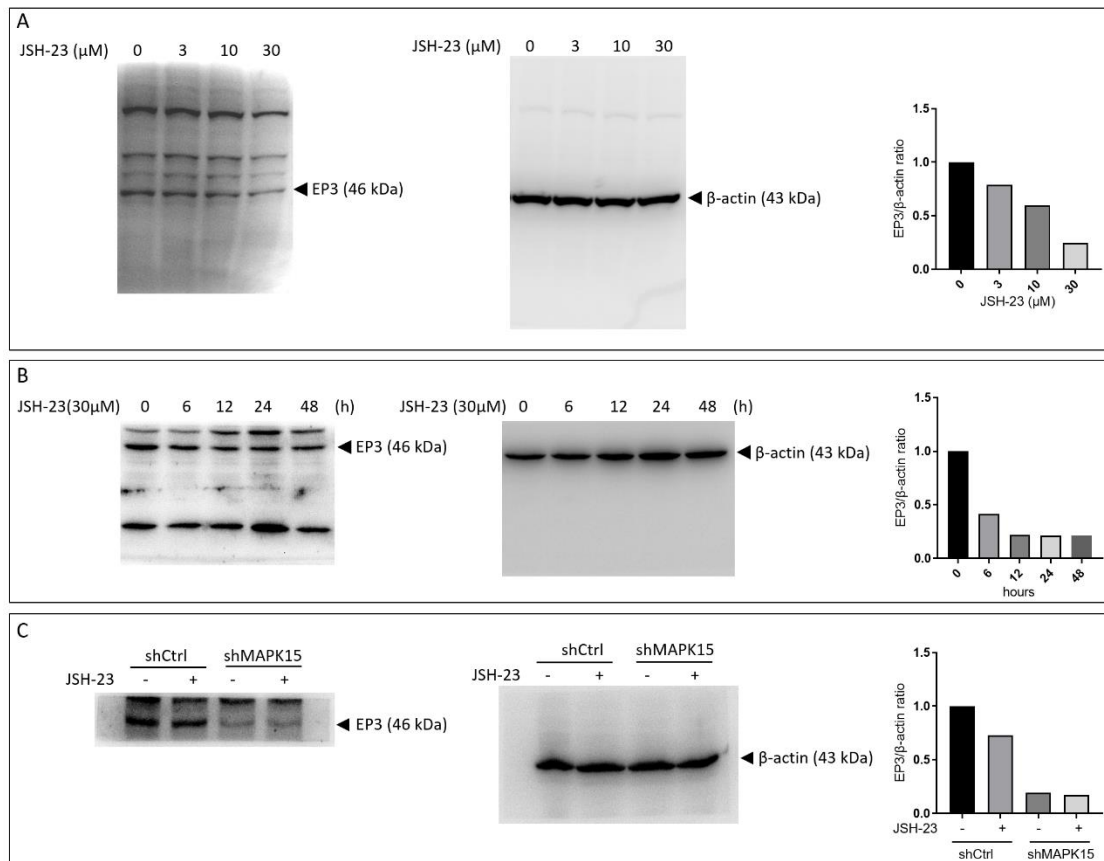

Figure S8. Original blots and blot quantification of Figure 5. Immunoblot analysis of EP3 expression corresponds to Figure 5A (A), Figure 5B (B), and Figure 5E(C).
